# Supplementary material for: Decoupling behavioral and transcriptional responses to color in an eyeless cnidarian
Source: PubMed Central journal article supplement (PMC7222589; doi:10.1186/s12864-020-6766-y), 2020-05-14

A.

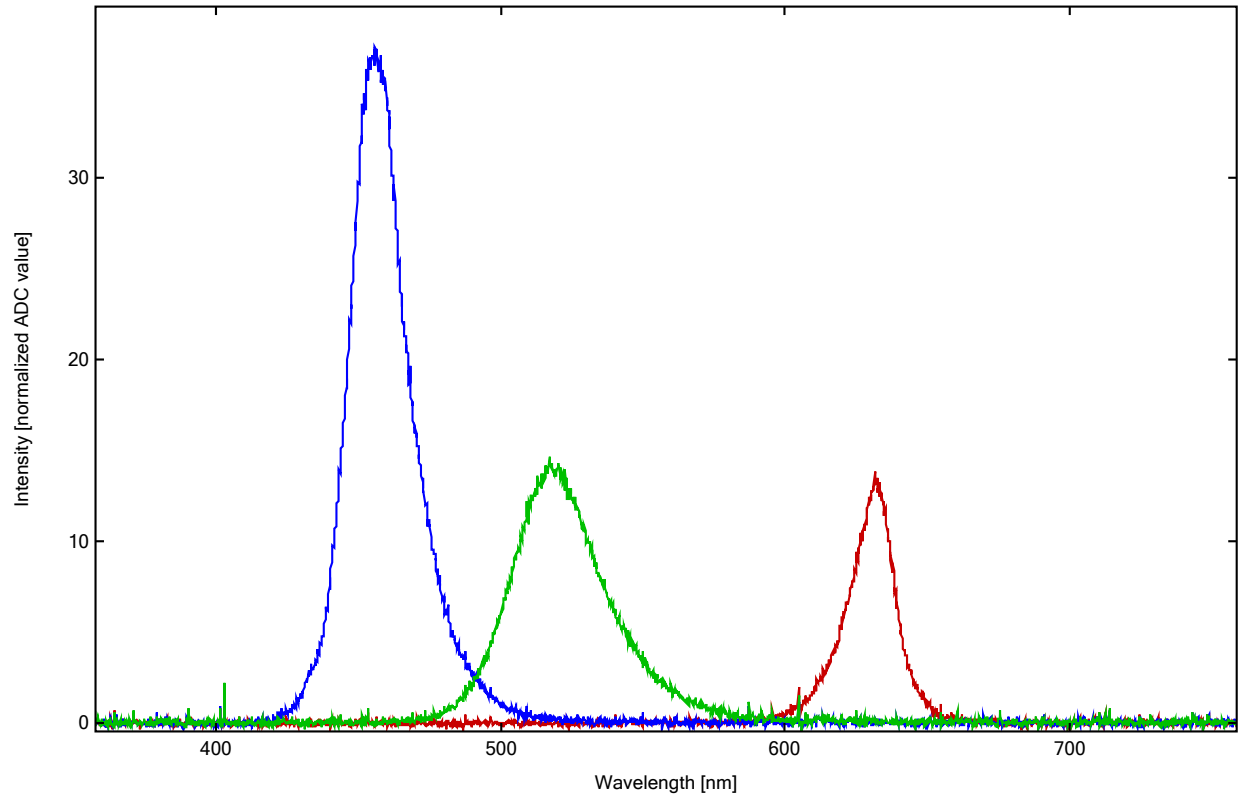

B.

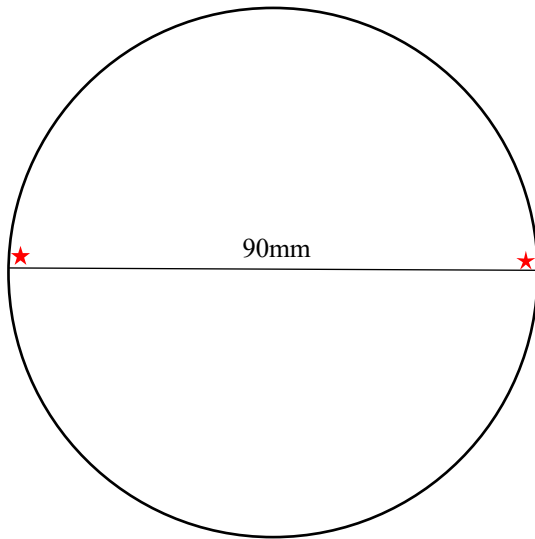

|       | <u>Outer</u> | <u>Inner</u> |
|-------|--------------|--------------|
| Blue  | 3.96-4.01    | 4.07-4.10    |
| Green | 2.47-2.55    | 2.54-2.58    |
| Red   | 1.69-1.80    | 1.81-1.84    |

Treatments

Sample Size

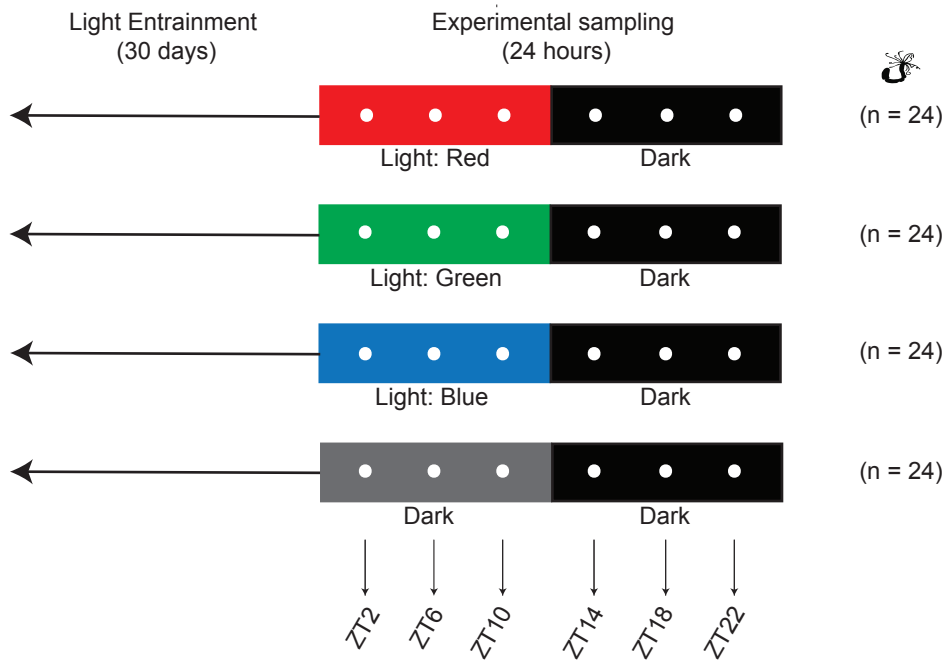

# Module-trait relationships

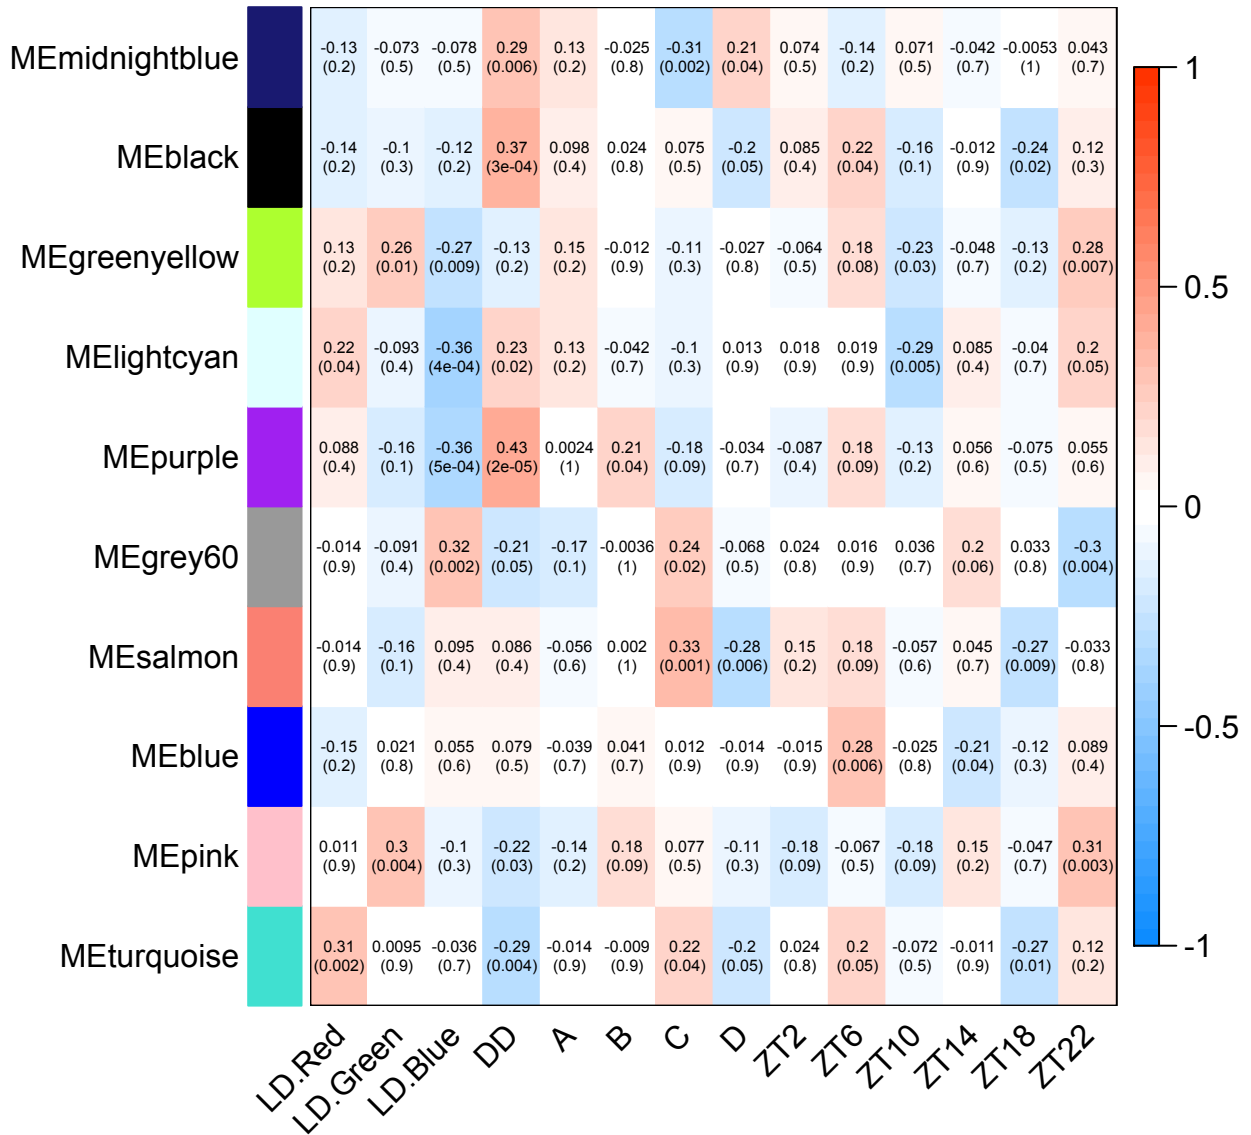

Supplement: 12864_2020_6766_MOESM1_ESM.pdf [file 12864_2020_6766_MOESM1_ESM.pdf]
